1  
2  
3  
4  
5  
6  
7  
8  
9  
10  
11  
12  
13  
14  
15  
16  
17  
18  
19  
20  
21  
22  
23

**Sex differences in cortisol and memory following acute social stress in amnesic mild cognitive impairment**

Kelly J. Murphy<sup>a,b</sup>, Paul A. S. Sheppard<sup>c</sup>, Angela K. Troyer<sup>a,b</sup>, Elizabeth Hampson<sup>d</sup>,  
& Liisa A.M. Galea<sup>c</sup>

<sup>a</sup>Neuropsychology and Cognitive Health Program, Baycrest, Toronto, Ontario, Canada

email: [kmurphy@baycrest.org](mailto:kmurphy@baycrest.org) and [atroyer@baycrest.org](mailto:atroyer@baycrest.org)

<sup>b</sup>Psychology Department, University of Toronto, Toronto, Ontario, Canada

<sup>c</sup>Djavad Mowafaghian Centre for Brain Health, Department of Psychology, University of British Columbia,  
Vancouver, British Columbia, Canada

email: [paul.sheppard@psych.ubc.ca](mailto:paul.sheppard@psych.ubc.ca) and [lgalea@psych.ubc.ca](mailto:lgalea@psych.ubc.ca)

<sup>d</sup>Psychology Department, Western University, London, Ontario, Canada

email: [ehampson@uwo.ca](mailto:ehampson@uwo.ca)

Address correspondence to:

Kelly J. Murphy, Ph.D.,

Neuropsychology and Cognitive Health Program, Baycrest,

3560 Bathurst Street, Toronto, Ontario, Canada, M6A 2E1

email: [kmurphy@baycrest.org](mailto:kmurphy@baycrest.org)

tel: +1 416-785-2500 x3184

fax: +1 416-785-4235

24 **Highlights:**

- 25 - Amnesic MCI (aMCI) is associated with higher morning cortisol
- 26 - Stress negatively influences memory in aMCI individuals
- 27 - Sex may moderate the effects of aMCI on cortisol and memory following stress
- 28 - The relationship between cortisol and memory may depend on brain health

29

30

**Abstract**

31

Older adults with amnesic mild cognitive impairment (aMCI) develop Alzheimer's-type Dementia

32

approximately ten times faster annually than the normal population. Higher levels of adrenal hormones are

33

associated with both aging and cognitive decline. In this study, salivary cortisol was sampled diurnally and

34

during memory testing to explore differences in the relationship between cortisol and memory function in males

35

and females with normal cognition and those with aMCI. Participants with aMCI (n=14, mean age=75) were

36

compared to age-matched controls (n=14, mean age=75) on tests of episodic, associative, and working memory

37

across two sessions with a psychosocial stressor in the second session. The aMCI group performed worse on the

38

memory tests than controls and males with aMCI had consistently elevated cortisol levels on both test days.

39

Immediate episodic memory performance was enhanced by stress in controls but not in the aMCI group,

40

indicating that aMCI is associated with increased vulnerability to stress-induced alterations in cortisol that can

41

negatively impact memory function.

42

43

**KEYWORDS:** cortisol, mild cognitive impairment, normal aging, memory, stress, psychosocial stressor, sex

44

differences, men, women, aMCI

45

46 **1. Introduction**

47 Normal aging results in declines in some cognitive domains, such as episodic memory, but not others,  
48 such as fund of knowledge (Cullum et al., 2000; Hedden & Gabrieli, 2004). Cognitive decline with aging is  
49 correlated with region specific changes in prefrontal cortex and medial temporal lobe (MTL), a key change being  
50 hippocampal volume loss (Raz, 2000; Raz & Rodrigue, 2006). These declines are accelerated in Alzheimer's  
51 Disease (AD)(Mungas et al., 2002; Shi, Liu, Zhou, Yu, & Jiang, 2009). Older adults with mild cognitive  
52 impairment (MCI) develop AD at a rate of 10-30% annually, depending on MCI subtype, whereas those without  
53 MCI develop dementia at a rate of only 1% to 2% annually (Busse, Bischkopf, Riedel-Heller, & Angermeyer,  
54 2003; Dawe, Procter, & Philpot, 1992; Lupien et al., 1998; Petersen et al., 1999). Thus, it is critical to identify  
55 neurobiological factors that may distinguish MCI from normal aging, such as differences in cortisol levels and  
56 their response to stress.

57 The stress hormone cortisol has been linked to memory performance, AD, and hippocampal volume  
58 (Lupien et al., 1998; Newcomer et al., 1999; Pruessner, Pruessner, Hellhammer, Bruce Pike, & Lupien, 2007).  
59 Indeed, AD participants have higher levels of plasma cortisol than controls (Hartmann, Veldhuis, Deuschle,  
60 Standhardt, & Heuser, 1997) and cerebrospinal fluid cortisol levels are higher in AD or MCI of AD type (aMCI)  
61 participants, as compared to controls or MCI of other types. Moreover, aMCI individuals with higher baseline  
62 cerebrospinal fluid cortisol levels experienced accelerated clinical worsening and cognitive decline (Popp et al.,  
63 2015). That study, however, did not measure diurnal cortisol or biological sex, both factors which may  
64 contribute to the findings. Although previous studies have identified sex differences in cortisol levels in response  
65 to stress (Kirschbaum, Wüst, & Hellhammer, 1992; Kudielka & Kirschbaum, 2005), few studies to date have  
66 examined the relationships between cortisol, stress, and memory and potential differences between males and  
67 females, particularly with regards to MCI or AD.

68 Sex differences are seen in incidence of MCI (Au, Dale-McGrath, & Tierney, 2017; Burke et al., 2019;  
69 Gale, Baxter, & Thompson, 2016; Koran, Wagener, Hohman, & Alzheimer's Neuroimaging Initiative, 2017;  
70 Mielke, Vemuri, & Rocca, 2014), with males more likely to develop MCI (both amnesic [aMCI] and non-  
71 amnesic subtypes) than females (Caracciolo et al., 2008; Jack et al., 2019; Roberts et al., 2012), although there  
72 are conflicting reports that are likely due to methodological differences (e.g. (Au et al., 2017; Mielke et al.,

73 2014)). However, AD disproportionately affects females, with significant sex differences observed with regards  
74 to severity, neuropathological markers, and rates of cognitive decline (Duarte-Guterman et al., 2019; Hebert,  
75 Weuve, Scherr, & Evans, 2013; Irvine, Laws, Gale, & Kondel, 2012; Sohn et al., 2018). Sex differences in  
76 incidence of AD is not uniformly seen (Jack et al., 2019) and may depend on geographic location (reviewed  
77 by Nebel et al 2018) or to men dying at younger ages (prior to development of or progression to AD) from  
78 other causes (Mielke et al., 2014). However, there are other sex differences in MCI to AD progression and  
79 symptom severity in AD. For example, women tend to develop MCI at a later age, perhaps benefitting from their  
80 established superior verbal memory (Sundermann et al., 2017), but progress to AD more rapidly than men when  
81 adjusted for age (Andersen et al., 1999; Fratiglioni et al., 1997; Letenneur et al., 1999; Liu et al., 1998; Ott et al.,  
82 1999; Roberts et al., 2014; Ruitenberg, Ott, van Swieten, Hofman, & Breteler, 2001; Yoshitake et al., 1995). In a  
83 recent meta-analysis, sex differences in AD diagnosis and pathology were most pronounced in participants with  
84 MCI (Koran et al., 2017). Of MCI individuals who had increased AD biomarkers (i.e. total-tau and amyloid-beta  
85 [A $\beta$ 42] ratio in cerebrospinal fluid), declines in cognitive ability were significantly worse in women compared to  
86 men (Sohn et al., 2018). The differences in verbal learning and delayed recall, as well as visual learning and  
87 memory, between healthy and MCI women were significantly greater than between healthy and MCI men (Gale  
88 et al., 2016). These differences persisted in those with AD (Gale et al., 2016). Thus, sex differences in severity  
89 and progression to AD are seen in individuals with MCI and identifying the biological causes of this  
90 phenomenon is critical to treatment and prevention.

91 Gonadal production of sex steroids is reduced, but not entirely eliminated, with age in women and, to a  
92 lesser extent, men; however, adrenal cortisol production increases with age (Laughlin & Barrett-Connor, 2000;  
93 Yen & Laughlin, 1998). Intriguingly, in addition to producing the stress hormone cortisol, the adrenal glands are  
94 also capable of producing androgens, which can be converted to estrogens in many tissues, including in the  
95 brain. While both sexes show increased cortisol levels with increased age, this effect is 3 times more pronounced  
96 in women (Otte et al., 2005) and increased cortisol levels are linked to poorer cognition and smaller hippocampal  
97 volume in older age (Lupien et al., 1998). Furthermore, women with AD present with more affective symptoms,  
98 increased hippocampal atrophy, and faster cognitive decline than men (Holland, Desikan, Dale, McEvoy, &  
99 Alzheimer's Disease Neuroimaging Initiative, 2013; Hua et al., 2010; Sinforiani et al., 2010), highlighting that

100 the underlying pathophysiology of AD may be different in men and women and should be further explored.

101 Although sex differences in AD have been identified, studies are scarce and even more so in MCI groups.

102 In this study we explored the relationship between diurnal fluctuations in cortisol, stress-induced  
103 cortisol, and memory performance in aMCI and control participants. A spatial working memory task known to  
104 be reliant on the integrity of the prefrontal cortex (Courtney, Petit, Maisog, Ungerleider, & Haxby, 1998) and an  
105 episodic and associative memory task known to be reliant on hippocampal integrity (Eichenbaum, 2017) were  
106 selected based on the known affinity of cortisol for these brain regions (Dedovic, Duchesne, Andrews, Engert, &  
107 Pruessner, 2009) and the potential of fluctuations in cortisol to influence cognitive efficiencies (Lupien,  
108 McEwen, Gunnar, & Heim, 2009). Because little is known as to whether there are sex differences in the  
109 relationship between aMCI and cortisol, we also used exploratory analyses of sex effects in the present study.  
110 We hypothesized that diurnal increases in cortisol release and increased release under stress, *via* the application  
111 of a psychosocial stressor (Trier Social Stress Test)(Kirschbaum, Pirke, & Hellhammer, 1993), would worsen  
112 memory scores in individuals with aMCI compared to controls and that there would be sex differences in these  
113 effects.

114

## 115 **2. Methods**

### 116 *2.1 Participants*

117 Older adults with age-normal memory (controls) and with mild memory decline (aMCI) suggestive of  
118 neurodegenerative disease of the Alzheimer type (Albert et al., 2011) were recruited for this study and provided  
119 informed voluntary consent to participate. As Table 1 shows, there was no significant difference in the ratio of  
120 females to males between the two participant groups ( $\chi=0.72$ ;  $p<0.39$ ) nor were there group differences on  
121 demographic variables relating to age, education, estimated verbal intellectual ability, or mood status (all  
122  $ps>0.43$ ). Although participants in the aMCI group performed within the normal range on a general index of  
123 cognitive status (Mini Mental Status Examination [MMSE])(Folstein, Folstein, & McHugh, 1975), their overall  
124 performance was significantly lower than the controls ( $t_{(1,26)}=2.36$   $p<0.05$ ,  $d=0.89$ ). A detailed description of the  
125 participant groups follows.

126

127 **Table 1:** *Demographic and Descriptive Data for the Participant Groups*

|                       | Control<br>( <i>n</i> = 14) | aMCI<br>( <i>n</i> = 14) | Cohen's <i>d</i> |
|-----------------------|-----------------------------|--------------------------|------------------|
| Age (years)           | 75.3 (8.7)                  | 74.6 (8.0)               | 0.08             |
| Female:Male ratio     | 7:7                         | 5:9                      |                  |
| Education (years)     | 14.4 (3.5)                  | 14.9 (3.0)               | 0.15             |
| MMSE                  | 29.0 (1.0)                  | 27.7 (1.9)               | 0.89             |
| Vocabulary SS         | 13.6 (2.9)                  | 13.8 (2.7)               | 0.07             |
| HADS Depression Scale | 2.6 (2.3)                   | 2.6 (2.3)                | 0                |
| HADS Anxiety Scale    | 5.1 (3.8)                   | 5.6 (2.5)                | 0.16             |

128 *Note.* Mean scores with standard deviations in parentheses. aMCI = amnesic mild cognitive impairment; MMSE  
129 = Mini-Mental Status Exam; SS = age-corrected scaled score. HADS = Hospital Anxiety Depression Scale with  
130 scores < 7 considered within normal limits.

131

132 *2.1.1. Control group.* Fourteen healthy older adults (age 61-86 years) were recruited *via* community talks,  
133 newspaper advertisements, and databases of research volunteers. Prior to invitation to participate, normal general  
134 cognitive status, using the Telephone Interview for Cognitive Status (Brandt, Spencer, & Folstein, 1988), and  
135 health status were confirmed in a telephone screening interview. At the first of two sessions, health history was  
136 further queried to verify that there was no history of a neurological, medical, or psychiatric disorder, substance  
137 abuse, or medications affecting cognition. Performance was within normal limits for age and education on  
138 measures of: a) general cognitive status (MMSE)(Folstein et al., 1975); b) memory (Rey-Osterrieth Figure  
139 Recall)(Spreen & Strauss, 1998); and c) self-reported mood (Hospital Anxiety and Depression Scale,  
140 HADS)(Zigmond & Snaith, 1983).

141 *2.1.2. aMCI group.* Fourteen individuals (age 59-85 years), recruited from physician referrals, from  
142 databases of research volunteers, and from newspaper advertisement, were classified as meeting the National  
143 Institute on Aging-Alzheimer's Association classification criteria for aMCI (Albert et al., 2011). The aMCI

144 status of 11 participants had been previously established and the stability of this classification was confirmed by  
145 the interview and neuropsychological testing administered during session 1. Three additional aMCI participants  
146 were identified based on the session 1 testing.

147

## 148 2.2. Procedure

149 Participants completed alternate versions of episodic, associative, and spatial memory tasks across two  
150 test sessions (Figure 1) conducted 7-14 days apart. Multiple salivary cortisol samples were taken using the  
151 Salivette™ method (Sarstedt Inc, Sarstedtstraße, Numbrecht, Germany). All memory tests were completed in the  
152 morning between 10:00h and 12:00h. Saliva was collected at 10:10h and 12:00h at the first test session. Basal  
153 salivary cortisol samples were taken from participants across three agreed upon days intervening between the  
154 test sessions. Participants were instructed not to eat, drink, or smoke for at least 30 minutes prior to saliva  
155 collection and to rinse their mouths with water 5 minutes before collecting the saliva. Five samples were  
156 collected per day on the following schedule: 30-minutes after awakening (ranged from 5:30 am to 8:30h), 09:00,  
157 16:00, 19:00, and 21:00h. Phone call reminders and verifications were provided by the examiner for each of the  
158 4 specified clock times on all three collection days. Participants were given pre-labeled saliva collection tubes  
159 and instructed to store their collected samples in the home refrigerator. Collection time of day was further  
160 verified by requiring participants to record the collection time on a label provided on the collection tube. The  
161 basal samples were gathered from participants when they returned for the second test session. Additional saliva  
162 samples were collected during the second session on the following schedule: 10:10h; immediately following the  
163 anticipation period to the application of a psychosocial stressor (~10:30h); 30 minutes following the application  
164 of the psychosocial stressor (~11:00h); and at about 12:00h, at the conclusion of the second test session. At the  
165 end of the study all saliva samples were packed in dry ice and shipped for analysis to the University of Western  
166 Ontario (EH, London, Ontario).

167 In addition to the memory tests of interest administered during both test sessions (see sections 2.2.1.-  
168 2.2.3.), the following neuropsychological measures were administered during session 1: cognitive screening  
169 (MMSE; (Folstein et al., 1975)), self-reported mood (HADS; (Zigmond & Snaith, 1983)), auditory attention  
170 span (Digit Span; (Wechsler, 1997)), confrontation naming (Boston Naming Test; (Kaplan, Goodglass, &

171 Weintraub, 1983)), visuospatial construction and immediate recall (Rey-Osterrieth Complex Figure-copy;  
172 (Spreen & Strauss, 1998)), and the Trail Making Test (Delis, Kaplan, & Kramer, 2001; Spreen & Strauss, 1998).  
173 Variations of certain neuropsychological measures were also administered during session 2, including self-  
174 reported mood status (Beck Depression Inventory, (Beck, Steer, & Carbin, 1988) and Coping Strategies Scale,  
175 (Robinson et al., 1997)) and Trail Making Test (Delis et al., 2001; Spreen & Strauss, 1998). Participant groups  
176 performed similarly on these neuropsychological measures, except in the measures of immediate memory for a  
177 complex figure ( $F_{(1,24)}=11.11$ ,  $p=0.003$ ,  $\eta^2=0.316$ ) and Trail Making Test B ( $F_{(1,26)}=7.852$ ,  $p=0.009$ ,  $\eta^2=0.232$ ).  
178 Although aMCI participants were significantly poorer than matched controls on these latter two measures, only  
179 performance on the immediate recall of the complex figure was below expectations based on normative data for  
180 age and education. The psychosocial stressor was applied during the second test session and is described  
181 subsequent to the memory tasks of interest.

182         2.2.1. *Episodic memory.* Two highly correlated versions (forms 5 and 6) of the HVLT-R (Brandt &  
183 Benedict, 2001) were used (Session 1: form 6; Session 2: form 5; with the exception of one aMCI participant to  
184 whom they were presented in the opposite order). This task involves an oral presentation of a 12-item word list  
185 over three learning trials, followed by a 20-minute delayed recall trial and a forced choice yes/no recognition  
186 trial. The recognition trial consists of 24 items comprised of the 12 target words, six semantically related foils,  
187 and six un-related foils. Measures of interest included total recall across three learning trials, total delayed recall,  
188 retention, and recognition discrimination accuracy measured as hits minus false alarms (H-FA).

189         2.2.2. *Associative recognition.* A face-name associative recognition test, created by Troyer and  
190 colleagues ((Troyer, D'Souza, Vandermorris, & Murphy, 2011; Troyer et al., 2012); modeled after (Mayes et al.,  
191 2004)), was used. Stimuli consisted of visually presented black-and-white images of faces (half male and half  
192 female) paired with aurally presented first names. Two versions of the task were used, each with 28 gender-  
193 appropriate face-name pairs. During the task, 20 faces were individually presented on the computer screen for 6  
194 seconds each with an inter-stimulus interval of 0.5 seconds; the examiner read the name associated with each  
195 face at the onset of each new face stimulus. Two study phases, differing only in stimulus presentation order,  
196 were administered in succession because our previous research (Troyer et al., 2008) indicated that item memory  
197 and association memory differences increase after repeated learning trials. Only 16 of the 20 face-name pairs



198 were considered test items as the first and last pairs in each study phase presentation were excluded to reduce  
199 primacy and recency effects on recognition accuracy. Following a 30 second delay, yes/no recognition testing  
200 was conducted with 24 face-name pairs presented, including eight intact pairs, eight recombined pairs, and eight  
201 new pairs presented in random order. During testing the examiner orally presented the name in the form of a  
202 question “Did I tell you this was [NAME]?” when the face appeared on the screen. Participants were instructed  
203 to say “yes” only to faces they had seen before that were paired with the correct name and “no” to faces they had  
204 not seen before, faces that were paired with the wrong name, or names they had not heard before. Immediately  
205 following testing, procedure verification was undertaken (i.e. participants retold the yes/no rules to the  
206 examiner). Participants were presented with unique, but equivalent (Troyer et al., 2011), sets of face-name pairs  
207 during sessions 1 and 2. Because we were specifically interested in memory for accurate associations, we  
208 manipulated the computation formula  $A' = \frac{1}{2} [(H-FA)(1+H-FA)] / 4H(1-FA)$  developed by (Grier, 1971) and  
209 reviewed by (Donaldson, 1992)) where H = the proportion of correctly identified intact pairs and FA = the  
210 proportion of false alarms to recombined pairs.

211 *2.2.3 Spatial working memory.* This task was modeled after the stimuli and procedures of Duff and  
212 Hampson (Duff & Hampson, 2000, 2001). A 4x5 rectangular array, measuring approximately 27cm in length  
213 and 34cm in width, consisting of coloured squares (10 colours, each represented twice) that were hidden under  
214 removable covers, was presented on a tabletop at which participants were seated. The coloured squares were  
215 randomly arranged on a uniform white backing and completely concealed beneath uniform white covers that  
216 could be temporarily lifted by participants to reveal the coloured square beneath. Participants were instructed to  
217 find all 10 pairs of matching coloured squares in as few choices as possible by lifting the covers two at a time.  
218 Prior to beginning the task, participants were familiarized with the colours of the test stimuli by having them  
219 view and name a set of 10 individual coloured squares. Each time a matching pair was located on the stimulus  
220 array, the examiner placed an individual coloured square representing the colour of the pair discovered at the top  
221 of the rectangular array, so participants did not need to remember which colour pairs had been found. Measures  
222 of interest included: the number of choices (squares uncovered) made in discovering all 10 matching pairs  
223 (criterion) and the time taken to reach criterion. Participants were told they would be timed and that they should  
224 attempt to locate all 10 pairs in as few choices as possible. Once they reached criterion, a second trial was

225 immediately administered, with a third trial administered following a 30-minute delay. The second trial  
226 permitted examination of immediate memory for the discovered locations and the third trial, after a delay,  
227 permitted examination of maintenance or continued savings on participants' efficiencies in reaching criterion.  
228 Locations of the coloured squares was constant within session but changed between sessions 1 and 2.

229         2.2.4. *Psychosocial stressor*. The psychosocial stressor used in this study was modeled after the TSST  
230 (Kirschbaum et al., 1993). The stressor was introduced immediately following the first saliva collection at  
231 10:10h. Participants were instructed to prepare a five-minute speech on the topic of '*The effect of tuna fishing on*  
232 *the dolphins and other ocean animals*' to be presented to a panel of three evaluators, including the examiner.  
233 They were given a pencil and paper and told to write down the points they would like to make in their speech for  
234 which they would have 10-minutes to prepare. The examiner then left the room and returned 10 minutes later,  
235 collected a saliva sample from the participant (anticipation period), and then led the participant to a conference  
236 room to give their speech. Participants were instructed to leave their written notes behind, to give their speech  
237 from memory, and to try and speak for five minutes, which was timed by the examiner. Immediately following  
238 the public speech, participants engaged in a five-minute serial subtraction task in which they were asked to count  
239 backwards aloud by 13 from the number 1022 as quickly and accurately as possible in front of the panel of  
240 evaluators. When an error was committed the participant was instructed to begin again from the number 1022.  
241 Following the subtraction task, participants were led back to the test room to undertake further memory testing  
242 and to provide additional saliva samples.

**Session 1**

**Session 2**

|       |                                                                      |
|-------|----------------------------------------------------------------------|
| 10:00 | Consent, interview, and instructions                                 |
| 10:10 | Saliva Sample #1                                                     |
| 10:15 | Face / Name Associative Memory Version A – Immediate                 |
| 10:30 | Hopkins Verbal Learning Test-Revised: Form 6 – Immediate             |
| 10:35 | Spatial Working Memory Version A – Immediate                         |
| 10:45 | Trail Making Test – A & B                                            |
| 10:50 | Face / Name Associative Memory Version A - Delay                     |
| 10:58 | Hopkins Verbal Learning Test-Revised: Form 6 - Delay                 |
| 11:00 | Mini-Mental Status Exam                                              |
| 11:05 | Spatial Working Memory Version A – Delay (20-25 minutes)             |
| 11:10 | WAIS-III Digit Span                                                  |
| 11:20 | Boston Naming Test (split half - odds)                               |
| 11:30 | Rey-Osterreith Figure Copy and Immediate Recall                      |
| 11:40 | WAIS-III Vocabulary (split half - odds)                              |
| 11:50 | Hospital Anxiety and Depression Scale                                |
| 11:55 | Saliva Sample #2, schedule at-home saliva collection, book session 2 |
| 12:05 | Session ends                                                         |

|       |                                                          |
|-------|----------------------------------------------------------|
| 10:00 | Beck's Anxiety and Depression Inventories                |
| 10:10 | Saliva sample #1 (~20 minutes before TSST)               |
| 10:13 | Instructions and consent for Trier Social Stress Test    |
| 10:18 | Trier Social Stress Test – preparation of speech         |
| 10:28 | Saliva sample #2 (immediately before TSST Speech)        |
| 10:31 | Trier Social Stress Test                                 |
| 10:43 | Hopkins Verbal Learning Test-Revised: Form 5 – Immediate |
| 10:48 | Face / Name Associative Memory Version B – Immediate     |
| 11:03 | Saliva Sample #3 (~30 minutes after beginning of TSST)   |
| 11:06 | Spatial Working Memory Version B – Immediate             |
| 11:16 | Hopkins Verbal Learning Test-Revised: Form 5 – Delay     |
| 11:18 | Face / Name Associative Memory Version B – Delay         |
| 11:23 | Spatial Working Memory Version B – Delay                 |
| 11:28 | Trail Making Test – A                                    |
| 11:33 | Coping Strategies Scale, SF-36 Health Survey             |
| 11:43 | Saliva Sample #4 (~60 minutes after beginning of TSST)   |
| 11:44 | Session ends                                             |

243

244 **Figure 1.** Timeline of Sessions and Testing within Sessions. Exact times varied based on individual variability.

245

246 *2.3. Saliva Collection and Analysis*

247 Saliva was collected using the Salivette™ method, centrifuged at 1500g, and kept frozen at -20°C prior  
 248 to analysis. Cotton-based collection is suitable for cortisol determinations but not for sex steroids, whose  
 249 concentrations can be inflated as much as 200% by the use of cotton devices (Büttler et al., 2018). Salivary  
 250 cortisol was analyzed in duplicate by the Neuroendocrinology Assay Laboratory at the University of Western  
 251 Ontario. An established <sup>125</sup>I solid-phase radioimmunoassay was used (Norman et al., 2010), based on antibody  
 252 and tracer obtained from Siemens Healthcare Diagnostics (Deerfield, IL). The Laboratory specializes in saliva  
 253 determinations. Briefly, saliva was analyzed directly, without extraction, using a 200µL aliquot and an extended  
 254 3hr incubation at room temperature. The calibration curve was diluted 1:10 and ranged from 0-138 nmol/L. The  
 255 intra-assay coefficient of variation calculated across low, medium, and high pools averaged 4.2% and the  
 256 sensitivity of the assay was < 0.25 nmol across 3 assay runs. All samples from a given participant were analyzed  
 257 in the same assay run and the average salivary cortisol concentration across the two duplicates (in nmol/L) was  
 258 the value used for all statistical analyses.

259

260 2.4. Data Analyses

261 Statistical analyses were performed using Statistica TIBCO Software (Palo Alto, CA, USA). Analyses of  
262 Variance (ANOVAs) were conducted on dependent variables of interest using group (control, MCI) and sex  
263 (male, female) as the between-subject factors. On cortisol measures and certain cognitive tests, time and/or  
264 session (1, 2) were also used as a within-subjects factor. Age was used as a covariate in all analyses. *Post hoc*  
265 analyses used Newman-Keul's comparisons. Due to the small sample size, exploratory analyses on possible sex  
266 effects were run using a Bonferroni correction on *a priori* analyses. A two-tailed significance criterion of  $p=0.05$   
267 was used for all statistical tests conducted.

268

269 **3. Results**

270 *3.1. Male aMCI participants have prolonged higher levels of cortisol in the morning compared to sex-matched*  
271 *controls, a pattern that is not observed in women.*

272 Only 21 of 28 participants completed all five time points for cortisol collection across three consecutive  
273 days. Analysis of these 21 participants revealed a main effect of time ( $F_{(4,68)}=34.39, p<0.001, \eta_p^2=0.669$ ; Figure  
274 2). *Post hoc* analyses revealed that awakening cortisol was higher than 09:00h cortisol among controls, both of  
275 which were higher than all other time points; there were no differences between the evening samples. Among  
276 male aMCI participants, the diurnal pattern of salivary cortisol was different with no significant difference  
277 between awakening and 09:00h ( $p=0.82$ ), and significant differences between control and aMCI participants at  
278 the 09:00h timepoint only. Furthermore, at the 09:00h time point, male aMCI participants had higher cortisol  
279 than controls ( $p=0.007$ ; Cohen's  $d=0.428$ ) but no other differences between controls and aMCI participants were  
280 evident at any other timepoint (all  $p$ 's  $>0.4$  for males;  $p>0.6$  for females). These findings indicate that aMCI is  
281 associated with higher morning cortisol levels than in controls in males. Unfortunately, very few women in the  
282 aMCI group completed all of the samples for saliva collection ( $n=2$ ). However, it is clear that these effects are  
283 driven by the aMCI men, as observed in Figure 2 and in a subsequent analysis with sex as a factor. In that  
284 analysis, men with aMCI had significantly higher levels of cortisol at 09:00h compared to controls ( $p=0.007$ )  
285 with no significant differences observed between women with or without aMCI across any time point:  $ps>0.69$ .  
286 There were no significant differences between groups in time of awakening.

287 We also calculated average cortisol area under the curve (AUC)(Pruessner, Kirschbaum, Meinlschmid,  
288 & Hellhammer, 2003) across all three days. With estimates for missing values, there was a trend for a main  
289 effect of sex with males showing higher cortisol than females ( $F_{(1,24)}=3.848$ ,  $\eta^2=0.138$ ,  $p=0.062$ ), but no other  
290 significant effects ( $ps >0.9$ ).

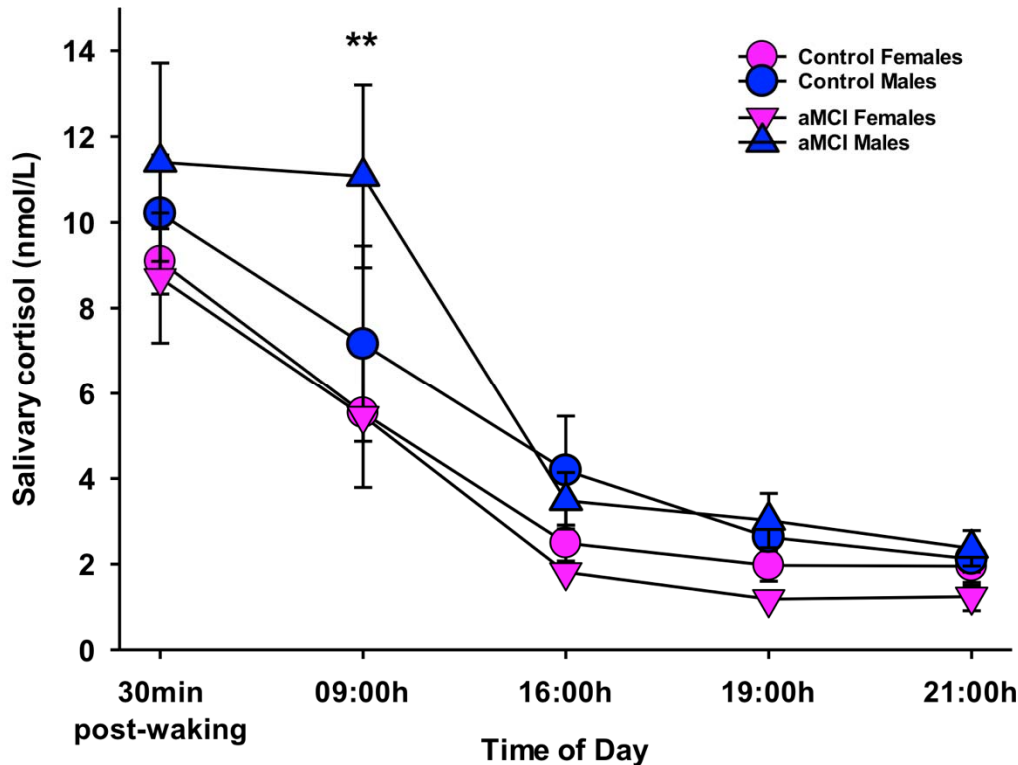

291 **Figure 2.** Mean salivary cortisol across five time points averaged across three days. The time points included 30  
292 minutes after awakening, 09:00, 16:00, 19:00, 21:00h on three consecutive days. Samples were collected in the  
293 home setting. Participants with aMCI, particularly males, showed a different pattern of diurnal cortisol release  
294 with levels of cortisol higher and prolonged during the morning compared to the evening and compared to  
295 matched controls. Males with aMCI had higher levels of cortisol at 09:00h compared to all other groups. Due to  
296 a number of people submitting incomplete saliva collection packages the sample size is (Control=13: females=7,  
297 males=6; MCI=8: females=2, males=6). \*\* $p=0.007$  aMCI males vs control males. Error bars represent standard  
298 error of the mean.  
299  
300

301 **3.2. Males with aMCI had higher levels of cortisol than controls in session 1 and during the first two time points**  
302 **in session 2. aMCI status and sex influence cortisol levels during TSST.**

303 Cortisol levels during the two test sessions were analyzed separately as the psychosocial stressor (TSST)  
304 was conducted during session 2. For cortisol on session 1, two outliers were removed from time point 1 (both  
305 men: 1 control, 1 aMCI). Men with aMCI had significantly higher levels of cortisol than any other group at the  
306 first time point (10:10) (all  $ps < 0.0006$ ; time by group by sex interaction:  $F_{(1,25)}=5.096$ ,  $p=0.032$ ,  $\eta_p=0.17$ ; Figure

307 3). There were also main effects of sex and time (main effect of sex:  $F_{(1,27)}=9.05, p=0.0056, \eta_p=0.25$ ; main effect  
308 of time:  $F_{(1,27)}=13.05, p=0.00012, \eta_p=0.33$ ).

309 During session 2, in which the TSST was performed, females had lower cortisol than males (main effect  
310 of sex:  $F_{(1,27)}=11.13, p=0.0025, \eta_p=0.29$ ). Furthermore, cortisol levels were highest 30min after the TSST was  
311 initiated compared to all other time points as expected (all  $ps<0.013$ ; main effect of time:  $F_{(3,81)}=4.90, p=0.0035,$   
312  $\eta_p=0.15$ ). However, aMCI participants had marginally higher cortisol levels than controls (main effect of group:  
313  $F_{(1,27)}=3.95, p=0.057, \eta_p=0.13$ ). *A priori* analyses indicated that males with aMCI had significantly higher levels  
314 of cortisol during the first two time points in the second session prior to the TSST (both  $ps<0.001$ ) whereas  
315 females with aMCI had significantly higher levels of cortisol 30min post-TSST than control females ( $p=0.007$ )  
316 but not at any other time point (all  $ps>0.23$ ; Figure 3).

317 We also examined the TSST cortisol levels as AUC and found that females had lower levels of cortisol  
318 than males (main effect of sex:  $F_{(1,27)}=8.99, p<0.006, \eta_p=0.25$ ) and aMCI had higher levels than controls (main  
319 effect of group:  $F_{(1,27)}=4.167, p=0.051, \eta_p=0.134$ ).

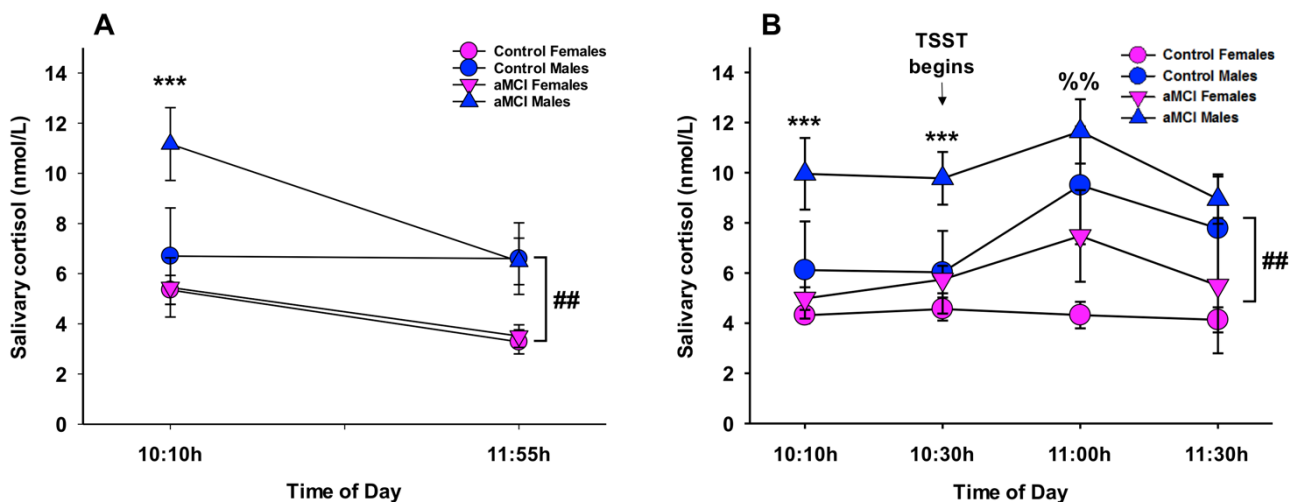

320  
321 **Figure 3.** Salivary cortisol measures across two test sessions. A) Session 1 saliva samples were taken at 10:10h  
322 and after cognitive testing at 11:55h. Overall males had higher levels of cortisol than females, with males with  
323 aMCI having the highest levels at the beginning of the test period. \*\*\*  $ps<0.0006$  aMCI males vs all other  
324 groups, ##  $p=0.0056$  main effect of sex. B) Session 2 saliva samples were collected *via* salivettes at 10:10h (10  
325 min after arrival and 20 minutes prior to the Trier Social Stress Test (TSST)), 10:30, 11:00, 11:30h. The TSST  
326 was initiated at 10:30h, so that the last sample was taken 60 min after the beginning of the TSST. Males had  
327 higher cortisol overall than females, with males with aMCI exhibiting the highest levels during the first two time  
328 points, prior to the stress testing. Thirty minutes after the TSST, all groups exhibited the highest levels of cortisol  
329 release (except control females). \*\*\*  $ps<0.001$  aMCI males vs all other groups, %%  $p=0.007$  aMCI females vs  
330 control females, ##  $p=0.0025$  main effect of sex. Error bars represent standard error of the mean.  
331

332 3.3. TSST was endorsed as anxiety provoking by females more than males with aMCI

333 Both sexes in the control group endorsed the TSST as anxiety provoking, with 57% of participants  
334 indicating that the TSST was anxiety provoking. However, among aMCI participants 80% of females but only  
335 11% of males indicated the TSST was anxiety provoking ( $\chi^2=6.169, p=0.013$ ). Of those participants who rated  
336 the TSST as anxiety provoking there was no significant difference in the rating of the anxiety level ( $ps>0.29$ ).

337

338 3.4. Stress enhanced immediate recall and word learning in the controls but not in participants with aMCI

339 Immediate recall of HVL-T-R was enhanced after the TSST in session 2 compared to session 1 in the  
340 controls ( $p=0.004$ ), but no such enhancement was seen in participants with aMCI ( $p=0.245$ ; interaction: group by  
341 session:  $F_{(1,27)}=7.6, p=0.010, \eta_p=0.22$ ). Breaking this down by sex, aMCI males had impaired immediate recall  
342 ( $p=0.04, d_4=0.55$ ) on session 2 following the stressor, but there was no significant difference in aMCI females  
343 ( $p=0.47$ ; Figure 4).

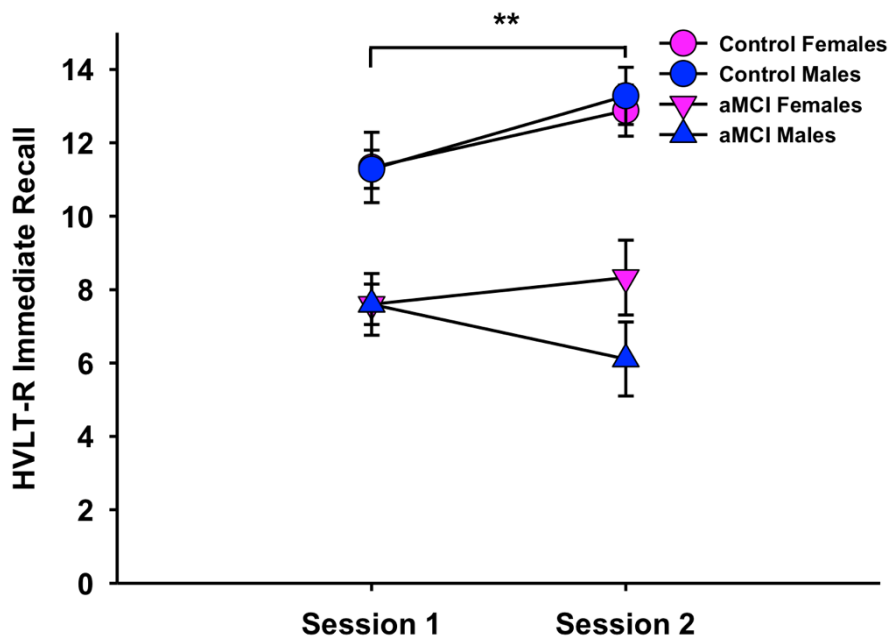

344 **Figure 4.** Stress enhanced immediate recall in the control participants but not in the aMCI participants. There  
345 was a Group by Session interaction ( $p=0.01$ ) with control participants showing greater recall after the Trier  
346 Social Stress Test (TSST) delivered in session 2 compared to session 1 ( $p=0.004$ ) but no such significant  
347 improvement in participants with aMCI ( $p=0.25$ ), an effect driven by males with aMCI. \*\*  $p=0.004$  session 1 vs  
348 session 2 control participants. Error bars represent standard error of the mean.

350

351 3.5. aMCI participants required more choices to complete the spatial working memory task than controls.



352 During sessions 1 and 2, aMCI participants made more choices than controls across all trials (main  
 353 effect of group: Session 1:  $F_{(1,27)}=7.66, p=0.01, \eta_p=0.22$ ; Session 2:  $F_{(1,27)}=15.38, p=0.0006, \eta_p=0.37$ ).  
 354 Furthermore, all participants required fewer choices by the delay trial (all  $p_s < 0.035$ ; main effect of trial (Session  
 355 1:  $F_{(2,54)}=3.15, p=0.0508, \eta_p=0.10$ ; Session 2:  $F_{(2,52)}=4.23, p=0.02, \eta_p=0.14$ ). There were no other significant main  
 356 effects or interactions (all  $p_s > 0.41$ ; Figure 5A).

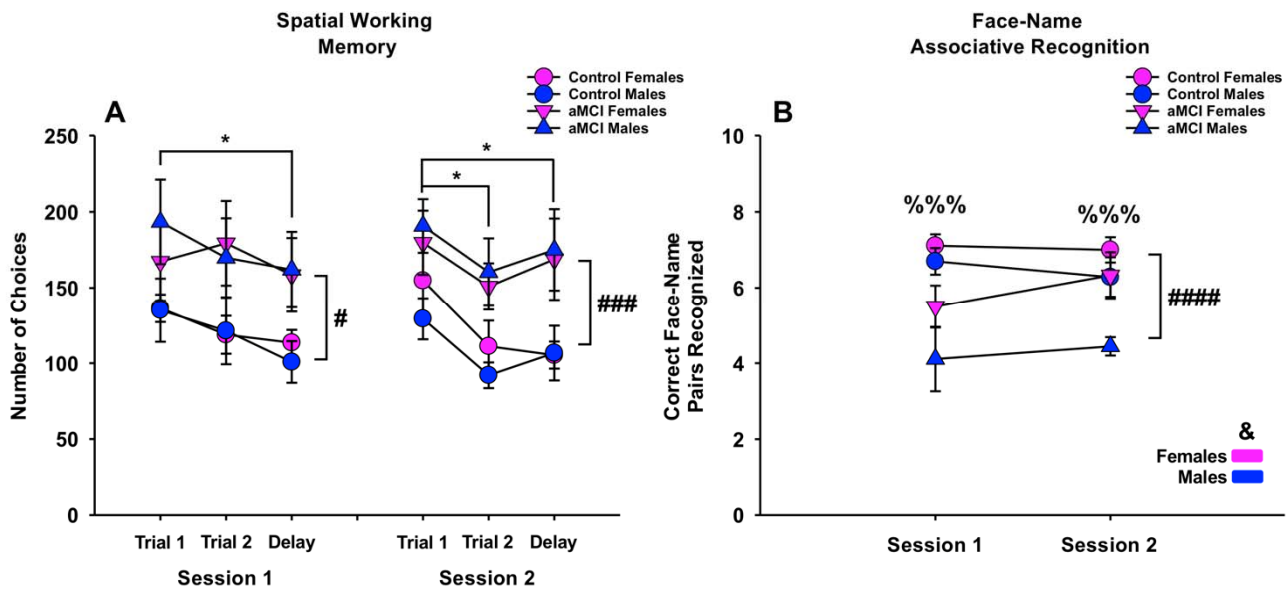

357 **Figure 5.** Spatial working memory and face-name associative recognition performance. A) aMCI participants  
 358 performed worse than controls in both session 1 ( $p=0.01$ ) and session 2 ( $p=0.0006$ ). Overall, participants made  
 359 fewer choices on the third trial (delayed testing) during both sessions and immediate recall in session 2 only. B)  
 360 aMCI participants correctly recognized fewer face-name pairs than controls ( $p < 0.00001$ ). This was driven by the  
 361 aMCI males who performed worse than male controls in both sessions ( $p_s < 0.001$ ). Additionally, despite aMCI  
 362 females performing similarly to female controls in session 2, there was a significant main effect of sex ( $p=0.01$ ).  
 363 Error bars represent standard error of the mean. #  $p=0.01$  aMCI vs controls session 1 spatial working memory,  
 364 ###  $p=0.0006$  aMCI vs controls session 2 spatial working memory, #####  $p < 0.00001$  aMCI vs controls face-  
 365 name associative recognition, \*  $p < 0.05$  intertrial differences for all participants in spatial working memory,  
 366 %%%  $p < 0.001$  aMCI males vs control males within session, &  $p=0.01$  main effect of sex.  
 367  
 368

### 369 3.6. aMCI participants performed worse on HVLT-R retention, delayed recall, and face-name pairs.

370 As expected, aMCI participants performed worse on the retention of the HVLT-R (main effect of group:  
 371  $F_{(1,27)}=29.00, p < 0.00001, \eta_p=0.52$ ) and face-name pairs (main effect of group:  $F_{(1,27)}=17.65, p < 0.00001, \eta_p=0.40$ ),  
 372 regardless of session. There were no other significant main or interaction effects for HVLT-R retention (all  
 373  $p_s > 0.20$ ). For face-name pairs, females remembered more pairs than males (main effect of sex:  $F_{(1,27)}=7.53,$   
 374  $p=0.01, \eta_p=0.22$ ). Intriguingly, aMCI participants performed worse than controls except for females with aMCI  
 375 during session 2 after the TSST ( $p=0.334$ ), whereas males with aMCI recalled fewer face-name pairs across both



376 sessions ( $p=0.0004$  and  $0.0009$ , respectively; Figure 5B). Finally, aMCI participants performed worse on HVLT-  
377 R delayed recall (main effect of group:  $F_{(1,27)}=63.22$ ,  $p<0.00001$ ,  $\eta_p=0.70$ ) and all participants performed better  
378 on session 2 than session 1 (main effect of session:  $F_{(1,27)}=7.15$ ,  $p<0.013$ ,  $\eta_p=0.21$ ). There were no other  
379 significant effects on delayed recall.

380 There were no differences among groups or sex on Trial Making (all  $ps>0.12$ ), but there was a main  
381 effect of session ( $F_{(1,27)}=5.017$ ,  $p=0.033$ ,  $\eta_p=0.16$ ). All participants performed better in session 2 than session 1.  
382 For MMSE there were no significant main or interaction effects, but the main effect of group approached  
383 significance ( $F_{(1,27)}=3.434$ ,  $p<0.075$ ,  $\eta_p=0.11$ ).

384

385 *3.7 aMCI participants rated their general health as better than controls*

386 Controls ( $X=2.467\pm 0.17$ ) rated their general health as worse than aMCI ( $X=1.786\pm 0.21$ ) participants  
387 ( $F_{(1,25)}=5.99$ ,  $p=0.028$ ,  $\eta_p=0.18$ ). However, given that the group means only differed by 0.681, it is doubtful that  
388 this is clinically relevant.

389

390 *3.8 Females endorsed more depressive symptoms on Beck Depression Inventory than males.*

391 Females, on average, scored higher than males on the Beck Depression Inventory ( $F_{(1,27)}=5.75$ ,  $p=0.023$ ,  
392  $\eta_p=0.18$ ). However, no participants reached criterion for suspicion of clinical depression. There were no other  
393 significant effects in the depression scores ( $p>0.1$ ). Moreover, there were no significant group or sex differences  
394 in Beck's Anxiety Scale (all  $ps>0.54$ ).

395

396 *3.9 Correlations between salivary cortisol and memory*

397 There was a positive correlation between retention on the HVLT-R and cortisol levels in session 1 in the  
398 controls ( $r=0.59$ ,  $p=0.025$ ) but not in participants with aMCI ( $r=-0.18$ ,  $p=0.53$ ; see Figure 6). These correlations  
399 were significantly different (Fisher's  $z=2.04$ ,  $p=0.041$ ). When broken down by sex, there was a negative  
400 correlation between immediate recall on the HVLT-R and salivary cortisol during session 1 for females with  
401 aMCI ( $r=-0.85$ ,  $p=0.03$ ,  $n=6$ ) and positive correlations with stress-induced cortisol in females with aMCI and  
402 learning ( $r=0.83$ ,  $p=0.041$ ) and learning slope on HVLT-R ( $r=0.91$ ,  $p=0.012$ ) but no significant correlations in

403 males with aMCI ( $p>0.4$ ,  $n=9$ ) or control males or females ( $p>0.09$ ). The correlations of immediate recall with  
404 session 1 salivary cortisol (Fisher's  $z=-2.31$ ,  $p=0.021$ ) and TSST-induced cortisol with learning slope (Fisher's  
405  $z=1.99$ ,  $p=0.047$ ) were significant between the sexes, whereas TSST-induced cortisol and learning were not  
406 ( $p=0.11$ ).

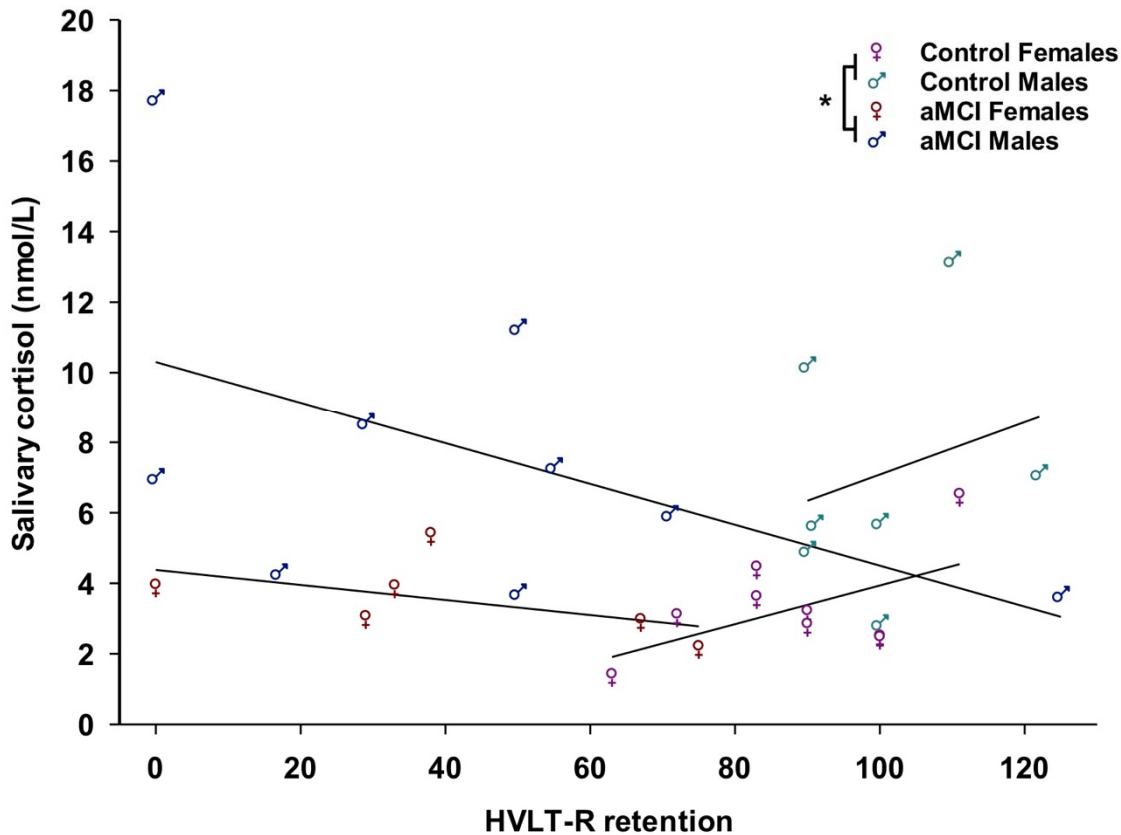

407  
408 **Figure 6.** Scatterplot of session 1 salivary cortisol levels plotted against HVLT-R retention by group (control,  
409 aMCI) and sex (male, female). Overall, there was a positive correlation between retention scores and cortisol  
410 levels in controls ( $r=0.59$ ,  $p=0.025$ ) but no significant relationship in MCI ( $r=-0.18$ ,  $p=0.53$ ), with these  
411 correlations being significantly different (Fisher's  $z=2.04$ ,  $p=0.041$ ). \*  $p<0.05$ .  
412

#### 413 4. Discussion

414 Cortisol levels were significantly higher in individuals with aMCI, an effect that was seen predominately  
415 in males and in morning samples. aMCI participants showed a different pattern of morning cortisol release than  
416 controls, with a higher and prolonged elevation at 9AM, an effect that was driven primarily by the males. Indeed,  
417 controls showed a significant decrease in cortisol from thirty minutes after awakening to 09:00h, while the only  
418 group to not show this decrease in cortisol were aMCI males. These results are partially consistent with previous  
419 findings (Beluche, Carrière, Ritchie, & Ancelin, 2010; Dijckmans et al., 2017; Evans et al., 2011; Tortosa-

420 Martínez, Manchado, Cortell-Tormo, & Chulvi-Medrano, 2018; Wang et al., 2018). Stress, as applied by the  
421 TSST, improved immediate verbal recall in controls, but not in participants with aMCI. Furthermore, our data  
422 revealed positive correlations between morning cortisol levels and verbal memory in controls, but there was no  
423 evidence for a positive relationship in participants with aMCI. These results highlight that morning cortisol is  
424 elevated in participants with aMCI, which may be related to negative performance on measures of immediate  
425 recall and retention of verbal memory. Furthermore, the opposite relationship was seen in controls with positive  
426 associations between salivary cortisol and verbal memory performance. While our sample size was small, our  
427 results are suggestive of sex differences in the relationship between cortisol (diurnal and stress-induced) and  
428 memory among control and aMCI participants, with males showing the most pronounced effects.

429

#### 430 *4.1. Morning cortisol levels are higher in males with aMCI.*

431 Amnesic MCI males had higher salivary cortisol levels as shown in diurnal home measurements, as  
432 well as at 10:00h in both of the sessions conducted in the laboratory. This finding is in partial contrast to a study  
433 investigating morning salivary cortisol levels in MCI participants of amnesic, non-amnesic, and multidomain  
434 type (Venero et al., 2013). That study found that salivary cortisol levels upon awakening were significantly  
435 higher in the non-amnesic and multidomain type but not in the amnesic type; however, in that study, partially  
436 consistent with our own, the mean awakening cortisol level was higher in amnesic participants than in controls.  
437 Although our study only included MCI of the amnesic type, we did find a significant increase in salivary  
438 cortisol at multiple time points and over several days: 30 minutes after awakening, at 09:00h in samples  
439 collected at home across three days, and at 10:00h in the two samples taken in the laboratory. In our study, these  
440 increases were mainly found in male participants. However, given that the Venero study (in which 69% of  
441 participants in the amnesic category were female) did not find any associations with diurnal cortisol and aMCI  
442 compared to our study where the findings were stronger in males, the lack of consideration of sex by those  
443 authors may have contributed to the inconsistencies between the two studies (Venero et al., 2013). Nevertheless,  
444 it is compelling that, in both their study and our own, increased morning levels of salivary cortisol are associated  
445 with MCI in general. While our sample size is much smaller than in the Venero study, we consistently observed  
446 high morning cortisol levels across 5 different days and under different conditions (i.e. home and laboratory),

447 suggesting a strong multiday effect. Our results suggest that further investigation into sex differences in diurnal  
448 cortisol levels is necessary in individuals with aMCI.

449

450 *4.2. Stress-induced increases in cortisol were associated with enhanced recall in controls but not in aMCI*

451 As expected, the TSST induced an increase in cortisol levels, which was associated with enhanced  
452 verbal recall in the HVLTR in controls but not in aMCI participants. These findings are consistent with a study  
453 by Wolf et al. (Wolf, Convit, Thorn, & de Leon, 2002), which found that there were negative correlations  
454 between average cortisol and immediate recall of paragraphs in MCI participants but not in controls. Similarly,  
455 healthy elderly have been found to exhibit a positive correlation between high cortisol and memory performance,  
456 whereas aMCI subjects exhibit a negative correlation (Souza-Talarico, Chaves, Lupien, Nitrini, & Caramelli,  
457 2010). Collectively, the present data and previous findings suggest that cortisol has opposing relationships with  
458 memory and recall in MCI vs normal aging.

459

460 *4.3. Sex may influence the effects of diurnal and stress-induced cortisol on memory in aMCI*

461 In a number of our major findings, males with aMCI showed a stronger relationship with cortisol level  
462 than did females with aMCI. This is intriguing and suggests that sex should be considered in future studies and  
463 research on age-related cognitive impairment. This is of particular relevance considering that a number of studies  
464 investigating memory and cortisol have had an imbalance of males or females in their test groups (e.g. (Souza-  
465 Talarico et al., 2010; Wolf et al., 2002)). However, due to a limited sample size in the current work, our sex-  
466 based analyses are exploratory and due caution should be paid when generalizing the results.

467 Our findings of marked sex differences are congruent with previous studies demonstrating  
468 epidemiological, symptomatic, and physiological differences between males and females with MCI. The  
469 prevalence of MCI has been found to be greater in males than females, with aMCI as the most common type  
470 (Petersen et al., 2010). Furthermore, the incidence of MCI is greater in males than in females (Roberts et al.,  
471 2012) and recent studies have uncovered sex-specific risk factors for MCI to AD progression (Kim et al., 2015).  
472 Although MCI is more prevalent in males, females exhibit faster deterioration in cognitive and functional  
473 measures over time (Lin et al., 2015). Sex differences are also evident in neurophysiological changes with

474 cognitive impairment, as females experience accelerated brain atrophic rates (Hua et al., 2010), as well as faster  
475 hippocampal atrophy (Ardekani, Convit, & Bachman, 2016). These findings, in accord with our data, emphasize  
476 the need to account for sex differences in future research in memory and cognition. Intriguingly, decreases in  
477 hippocampal volume predict progression to probable AD (and MCI) in women, whereas increases in white  
478 matter hyperintensities in men predict progression to MCI (Burke et al., 2019). Optimistically, there is  
479 preliminary evidence that cognitive training in those with aMCI is more effective in women than men (Rahe,  
480 Liesk, et al., 2015) but remains effective in both sexes (Kalbe et al., 2018; Rahe, Becker, et al., 2015; Rahe,  
481 Liesk, et al., 2015; Rahe, Petrelli, et al., 2015).

482  
483 *4.4. The relationship between cortisol and memory may depend on brain health*

484 Higher cortisol levels should not always be thought of as detrimental to brain function. Indeed, in the  
485 present study we found a positive correlation between delayed word-list recall on the HVL-T-R and cortisol  
486 levels in session 1 in the control participants. No significant relationship was found in aMCI participants (and the  
487 direction of the effect was negative). These findings are consistent with at least two other studies (Souza-  
488 Talarico et al., 2010; Wolf et al., 2002). Souza-Talarico et al. (2010) showed a positive relationship between  
489 cortisol and delayed recall in controls but a negative relationship in people with MCI. Furthermore, Wolf et al.  
490 (2002) showed a negative correlation between average cortisol and immediate story recall in MCI participants  
491 but no relationship to average cortisol in controls. While the correlations had opposing findings being significant  
492 in either controls or MCI, the relationships between cortisol and memory are consistently opposing whether  
493 considering normal aging or MCI. This is provocative in that these findings collectively span multiple cortisol  
494 measures (average, awakening, test session) and memory components (immediate or delayed recall, retention).

495 In our study, we found that aMCI females exhibited a negative correlation between immediate recall on  
496 the HVL-T-R and salivary cortisol during session 1. Furthermore, a positive correlation between stress-induced  
497 cortisol and learning and learning slope on HVL-T-R was observed in the females with aMCI. Neither males with  
498 aMCI nor controls (either sex) displayed any significant correlations.

499 Finally, it is important to be aware that increased cortisol is not always associated with poorer memory  
500 performance. A clear example of this is observed in our study: stress-induced increases in cortisol by the TSST

501 were followed by an improved immediate recall in the HVLTL-R in controls but not in aMCI participants. This  
502 again suggests that cortisol may play an adverse role in memory in aMCI but a positive role in healthy  
503 participants, particularly in males. One can speculate that an exaggerated stress response in aMCI participants  
504 increases cortisol to a detrimental level, whereas in controls the moderate increase in cortisol is enough to  
505 enhance performance. Indeed, other research has found a positive association between cortisol and memory  
506 (Vogel & Schwabe, 2016). For example, physical exercise can be linked to improved cognition (Barha, Davis,  
507 Falck, Nagamatsu, & Liu-Ambrose, 2017) and increased cortisol (Hötting, Schickert, Kaiser, Röder, & Schmidt-  
508 Kassow, 2016), even in participants with MCI (Barha, Hsiung, et al., 2017; Liu-Ambrose, Barha, & Best, 2018;  
509 Tortosa-Martínez et al., 2018), albeit it is not clear the nature or direction of this relationship. Furthermore, there  
510 are well known sex differences in the effects of corticosterone in animal models, thus it is probable that males  
511 and females will show opposing or different effects (Gobinath, Workman, Chow, Lieblich, & Galea, 2016). For  
512 example, acute stress can facilitate learning in male rats but impair conditioning in female rats (Wood & Shors,  
513 1998). However, the effects of age and stress on learning are not as well studied (S. J. Lupien, Maheu, Tu,  
514 Fiocco, & Schramek, 2007). In light of these findings, we encourage the research community to make it a  
515 priority to examine sex as a factor in analyses of aging and cognition.

516

## 517 **5. Conclusions**

518 The present study shows clear effects of aMCI on diurnal and stress-affected cortisol levels, as well as  
519 stress-induced impairments in spatial memory; however, these effects are driven primarily by males in our  
520 sample, as they showed greater increases in cortisol and greater impairments when compared to same-sex  
521 controls than females did. While our sex-based analyses are exploratory as a result of low sample size, sex  
522 differences were observed in both cortisol levels and memory performance, with aMCI as a moderating factor. It  
523 is critical that future studies explore sex as a biological variable in this area as we have presented evidence  
524 herein that suggests that effects at the confluence of aMCI and stress can be obfuscated or otherwise eliminated  
525 when males and females are grouped. For real understanding and advancement to take place in this field,  
526 biological sex must be considered and statistically analyzed.

527 Estimates of the prevalence of MCI in the elderly show high variability, ranging from ~3-42% (Ward,  
528 Arrighi, Michels, & Cedarbaum, 2012), due to differences in study methodology (Sachdev et al., 2015),  
529 especially with regards to the sample population (age, ethnicity, education-level, etc.). Regardless, there is a  
530 clear health care burden associated with MCI (Lin & Neumann, 2013; Ton et al., 2017). As those with MCI are  
531 more likely to develop AD (Busse et al., 2003; Dawe et al., 1992; Lupien et al., 1998; Petersen et al., 1999) and  
532 the health care burdens of AD are more severe than those of MCI (Lin & Neumann, 2013; Ton et al., 2017),  
533 understanding this prevalent condition is important to those with the condition and their caregivers, as well as to  
534 policymakers. Future studies should make examining sex differences (their nature, underlying mechanisms,  
535 outcomes, etc.) in aMCI a priority, as well as expand upon the influence of cortisol in aMCI and the interactions  
536 between these factors.

537

#### 538 **Acknowledgments**

539 We gratefully acknowledge the participants for generously volunteering their time and effort. We thank Triti  
540 Namiranian, Angelina Polsinelli, Nicole D'Souza, Diana Smith, Preeyam Parikha, and Tallinn Splinter for  
541 assistance with data collection and management and Elizabeth Perez for editorial assistance. This study was  
542 supported by grants from the Canadian Institutes of Health Research (CIHR-IA #131486 to LAMG, KJM, and  
543 AKT) and by the Morris Goldenberg Medical Research Endowment (to KJM).

544

#### 545 **Disclosure statement**

546 The authors have nothing to disclose.

547



548 **References**

- 549 Albert, M. S., DeKosky, S. T., Dickson, D., Dubois, B., Feldman, H. H., Fox, N. C., ... Phelps, C. H.  
550 (2011). The diagnosis of mild cognitive impairment due to Alzheimer's disease:  
551 Recommendations from the National Institute on Aging-Alzheimer's Association workgroups  
552 on diagnostic guidelines for Alzheimer's disease. *Alzheimer's & Dementia: The Journal of the*  
553 *Alzheimer's Association*, 7(3), 270–279. <https://doi.org/10.1016/j.jalz.2011.03.008>
- 554 Andersen, K., Launer, L. J., Dewey, M. E., Letenneur, L., Ott, A., Copeland, J. R., ... Hofman, A.  
555 (1999). Gender differences in the incidence of AD and vascular dementia: The EURODEM  
556 Studies. EURODEM Incidence Research Group. *Neurology*, 53(9), 1992–1997.
- 557 Ardekani, B. A., Convit, A., & Bachman, A. H. (2016). Analysis of the MIRIAD Data Shows Sex  
558 Differences in Hippocampal Atrophy Progression. *Journal of Alzheimer's Disease: JAD*, 50(3),  
559 847–857. <https://doi.org/10.3233/JAD-150780>
- 560 Au, B., Dale-McGrath, S., & Tierney, M. C. (2017). Sex differences in the prevalence and incidence of  
561 mild cognitive impairment: A meta-analysis. *Ageing Research Reviews*, 35, 176–199.  
562 <https://doi.org/10.1016/j.arr.2016.09.005>
- 563 Barha, C. K., Davis, J. C., Falck, R. S., Nagamatsu, L. S., & Liu-Ambrose, T. (2017). Sex differences  
564 in exercise efficacy to improve cognition: A systematic review and meta-analysis of  
565 randomized controlled trials in older humans. *Frontiers in Neuroendocrinology*, 46, 71–85.  
566 <https://doi.org/10.1016/j.yfrne.2017.04.002>
- 567 Barha, C. K., Hsiung, G.-Y. R., Best, J. R., Davis, J. C., Eng, J. J., Jacova, C., ... Liu-Ambrose, T.  
568 (2017). Sex Difference in Aerobic Exercise Efficacy to Improve Cognition in Older Adults with  
569 Vascular Cognitive Impairment: Secondary Analysis of a Randomized Controlled Trial.  
570 *Journal of Alzheimer's Disease: JAD*, 60(4), 1397–1410. <https://doi.org/10.3233/JAD-170221>



- 571 Beck, A. T., Steer, R. A., & Carbin, M. G. (1988). Psychometric properties of the Beck Depression  
572 Inventory: Twenty-five years of evaluation. *Clinical Psychology Review*, 8(1), 77–100.  
573 [https://doi.org/10.1016/0272-7358\(88\)90050-5](https://doi.org/10.1016/0272-7358(88)90050-5)
- 574 Beluche, I., Carrière, I., Ritchie, K., & Ancelin, M. L. (2010). A prospective study of diurnal cortisol  
575 and cognitive function in community-dwelling elderly people. *Psychological Medicine*, 40(6),  
576 1039–1049. <https://doi.org/10.1017/S0033291709991103>
- 577 Brandt, J., & Benedict, R. H. B. (2001). *Hopkins verbal learning test—Revised: Professional manual*.  
578 Lutz, FL: Psychological Assessment Resources.
- 579 Brandt, J., Spencer, M., & Folstein, M. F. (1988). The telephone interview for cognitive status.  
580 *Neuropsychiatry, Neuropsychology and Behavioral Neurology*, 1(2), 111–117.
- 581 Burke, S. L., Hu, T., Fava, N. M., Li, T., Rodriguez, M. J., Schuldiner, K. L., ... Laird, A. (2019). Sex  
582 differences in the development of mild cognitive impairment and probable Alzheimer’s disease  
583 as predicted by hippocampal volume or white matter hyperintensities. *Journal of Women &*  
584 *Aging*, 31(2), 140–164. <https://doi.org/10.1080/08952841.2018.1419476>
- 585 Busse, A., Bischof, J., Riedel-Heller, S. G., & Angermeyer, M. C. (2003). Mild cognitive  
586 impairment: Prevalence and incidence according to different diagnostic criteria. Results of the  
587 Leipzig Longitudinal Study of the Aged (LEILA75+). *The British Journal of Psychiatry: The*  
588 *Journal of Mental Science*, 182, 449–454.
- 589 Büttler, R. M., Bagci, E., Brand, H. S., Heijer, M. den, Blankenstein, M. A., & Heijboer, A. C. (2018).  
590 Testosterone, androstenedione, cortisol and cortisone levels in human unstimulated, stimulated  
591 and parotid saliva. *Steroids*, 138, 26–34. <https://doi.org/10.1016/j.steroids.2018.05.013>
- 592 Caracciolo, B., Palmer, K., Monastero, R., Winblad, B., Bäckman, L., & Fratiglioni, L. (2008).  
593 Occurrence of cognitive impairment and dementia in the community: A 9-year-long prospective  
594 study. *Neurology*, 70(19 Pt 2), 1778–1785.  
595 <https://doi.org/10.1212/01.wnl.0000288180.21984.cb>

- 596 Courtney, S. M., Petit, L., Maisog, J. M., Ungerleider, L. G., & Haxby, J. V. (1998). An Area  
597 Specialized for Spatial Working Memory in Human Frontal Cortex. *Science*, 279(5355), 1347–  
598 1351. <https://doi.org/10.1126/science.279.5355.1347>
- 599 Cullum, S., Huppert, F. A., McGee, M., Dening, T., Ahmed, A., Paykel, E. S., & Brayne, C. (2000).  
600 Decline across different domains of cognitive function in normal ageing: Results of a  
601 longitudinal population-based study using CAMCOG. *International Journal of Geriatric*  
602 *Psychiatry*, 15(9), 853–862.
- 603 Dawe, B., Procter, A., & Philpot, M. (1992). Concepts of mild memory impairment in the elderly and  
604 their relationship to dementia: A review. *International Journal of Geriatric Psychiatry*, 7(7),  
605 473–479. <https://doi.org/10.1002/gps.930070704>
- 606 Dedovic, K., Duchesne, A., Andrews, J., Engert, V., & Pruessner, J. C. (2009). The brain and the stress  
607 axis: The neural correlates of cortisol regulation in response to stress. *NeuroImage*, 47(3), 864–  
608 871. <https://doi.org/10.1016/j.neuroimage.2009.05.074>
- 609 Delis, D., Kaplan, E., & Kramer, J. H. (2001). *Delis-Kaplan Executive Function System™*. Retrieved  
610 from [https://www.pearsonclinical.com/psychology/products/100000618/deliskaplan-executive-](https://www.pearsonclinical.com/psychology/products/100000618/deliskaplan-executive-function-system-d-kefs.html)  
611 [function-system-d-kefs.html](https://www.pearsonclinical.com/psychology/products/100000618/deliskaplan-executive-function-system-d-kefs.html)
- 612 Dijckmans, B., Tortosa-Martínez, J., Caus, N., González-Caballero, G., Martínez-Pelegrin, B.,  
613 Manchado-Lopez, C., ... Clow, A. (2017). Does the diurnal cycle of cortisol explain the  
614 relationship between physical performance and cognitive function in older adults? *European*  
615 *Review of Aging and Physical Activity*, 14. <https://doi.org/10.1186/s11556-017-0175-5>
- 616 Donaldson, W. (1992). Measuring recognition memory. *Journal of Experimental Psychology: General*,  
617 121(3), 275–277. <https://doi.org/10.1037/0096-3445.121.3.275>
- 618 Duarte-Guterman, P., Inkster, A. M., Albert, A. Y., Barha, C., Robinson, W. P., Galea, L. A. M.,  
619 Alzheimer's Disease Neuroimaging Initiative. (2019). Sex and APOE genotype influence AD

620 neuropathology but not epigenetic age across diagnosis. *bioRxiv*.

621 <https://doi.org/10.1101/741777>

622 Duff, S. J., & Hampson, E. (2000). A beneficial effect of estrogen on working memory in  
623 postmenopausal women taking hormone replacement therapy. *Hormones and Behavior*, 38(4),  
624 262–276. <https://doi.org/10.1006/hbeh.2000.1625>

625 Duff, S. J., & Hampson, E. (2001). A sex difference on a novel spatial working memory task in  
626 humans. *Brain and Cognition*, 47(3), 470–493. <https://doi.org/10.1006/brcg.2001.1326>

627 Eichenbaum, H. (2017). Prefrontal-hippocampal interactions in episodic memory. *Nature Reviews*.  
628 *Neuroscience*, 18(9), 547–558. <https://doi.org/10.1038/nrn.2017.74>

629 Evans, P. D., Fredhoi, C., Loveday, C., Hucklebridge, F., Aitchison, E., Forte, D., & Clow, A. (2011).  
630 The diurnal cortisol cycle and cognitive performance in the healthy old. *International Journal*  
631 *of Psychophysiology: Official Journal of the International Organization of Psychophysiology*,  
632 79(3), 371–377. <https://doi.org/10.1016/j.ijpsycho.2010.12.006>

633 Folstein, M. F., Folstein, S. E., & McHugh, P. R. (1975). “Mini-mental state”. A practical method for  
634 grading the cognitive state of patients for the clinician. *Journal of Psychiatric Research*, 12(3),  
635 189–198.

636 Fratiglioni, L., Viitanen, M., von Strauss, E., Tontodonati, V., Herlitz, A., & Winblad, B. (1997). Very  
637 old women at highest risk of dementia and Alzheimer’s disease: Incidence data from the  
638 Kungsholmen Project, Stockholm. *Neurology*, 48(1), 132–138.

639 Gale, S. D., Baxter, L., & Thompson, J. (2016). Greater memory impairment in dementing females  
640 than males relative to sex-matched healthy controls. *Journal of Clinical and Experimental*  
641 *Neuropsychology*, 38(5), 527–533. <https://doi.org/10.1080/13803395.2015.1132298>

642 Gobinath, A. R., Workman, J. L., Chow, C., Lieblich, S. E., & Galea, L. A. M. (2016). Maternal  
643 postpartum corticosterone and fluoxetine differentially affect adult male and female offspring

- 644 on anxiety-like behavior, stress reactivity, and hippocampal neurogenesis. *Neuropharmacology*,  
645 *101*, 165–178. <https://doi.org/10.1016/j.neuropharm.2015.09.001>
- 646 Grier, J. B. (1971). Nonparametric indexes for sensitivity and bias: Computing formulas. *Psychological*  
647 *Bulletin*, *75*(6), 424–429.
- 648 Hartmann, A., Veldhuis, J. D., Deuschle, M., Standhardt, H., & Heuser, I. (1997). Twenty-four hour  
649 cortisol release profiles in patients with Alzheimer’s and Parkinson’s disease compared to  
650 normal controls: Ultradian secretory pulsatility and diurnal variation. *Neurobiology of Aging*,  
651 *18*(3), 285–289.
- 652 Hebert, L. E., Weuve, J., Scherr, P. A., & Evans, D. A. (2013). Alzheimer disease in the United States  
653 (2010-2050) estimated using the 2010 census. *Neurology*, *80*(19), 1778–1783.  
654 <https://doi.org/10.1212/WNL.0b013e31828726f5>
- 655 Hedden, T., & Gabrieli, J. D. E. (2004). Insights into the ageing mind: A view from cognitive  
656 neuroscience. *Nature Reviews. Neuroscience*, *5*(2), 87–96. <https://doi.org/10.1038/nrn1323>
- 657 Holland, D., Desikan, R. S., Dale, A. M., McEvoy, L. K., & Alzheimer’s Disease Neuroimaging  
658 Initiative. (2013). Higher rates of decline for women and apolipoprotein E epsilon4 carriers.  
659 *AJNR. American Journal of Neuroradiology*, *34*(12), 2287–2293.  
660 <https://doi.org/10.3174/ajnr.A3601>
- 661 Hötting, K., Schickert, N., Kaiser, J., Röder, B., & Schmidt-Kassow, M. (2016). The Effects of Acute  
662 Physical Exercise on Memory, Peripheral BDNF, and Cortisol in Young Adults. *Neural*  
663 *Plasticity*, *2016*, 6860573. <https://doi.org/10.1155/2016/6860573>
- 664 Hua, X., Hibar, D. P., Lee, S., Toga, A. W., Jack, C. R., Weiner, M. W., ... Alzheimer’s Disease  
665 Neuroimaging Initiative. (2010). Sex and age differences in atrophic rates: An ADNI study with  
666 n=1368 MRI scans. *Neurobiology of Aging*, *31*(8), 1463–1480.  
667 <https://doi.org/10.1016/j.neurobiolaging.2010.04.033>

- 668 Irvine, K., Laws, K. R., Gale, T. M., & Kondel, T. K. (2012). Greater cognitive deterioration in women  
669 than men with Alzheimer's disease: A meta analysis. *Journal of Clinical and Experimental*  
670 *Neuropsychology*, 34(9), 989–998. <https://doi.org/10.1080/13803395.2012.712676>
- 671 Jack, C. R. Jr., Therneau, T. M., Weigand S. D., Wiste, H. J., Knopman D. S., Vemuri, P., ... Petersen  
672 R. C. (2019). Prevalence of Biologically vs Clinically Defined Alzheimer Spectrum Entities  
673 Using the National Institute on Aging–Alzheimer's Association Research Framework. *JAMA*  
674 *Neurology*. Publish online July 15, 2019. <https://doi.org/10.1001/jamaneurol.2019.1971>
- 675 Kalbe, E., Roheger, M., Paluszak, K., Meyer, J., Becker, J., Fink, G. R., ... Kessler, J. (2018). Effects  
676 of a Cognitive Training With and Without Additional Physical Activity in Healthy Older  
677 Adults: A Follow-Up 1 Year After a Randomized Controlled Trial. *Frontiers in Aging*  
678 *Neuroscience*, 10, 407. <https://doi.org/10.3389/fnagi.2018.00407>
- 679 Kaplan, E., Goodglass, H., & Weintraub, S. (1983). *Boston Naming Test* (2nd ed.). Retrieved from  
680 <https://www.pearsonclinical.com.au/products/view/525>
- 681 Kim, S., Kim, M. J., Kim, S., Kang, H. S., Lim, S. W., Myung, W., ... Kim, D. K. (2015). Gender  
682 differences in risk factors for transition from mild cognitive impairment to Alzheimer's disease:  
683 A CREDOS study. *Comprehensive Psychiatry*, 62, 114–122.  
684 <https://doi.org/10.1016/j.comppsy.2015.07.002>
- 685 Kirschbaum, C., Pirke, K. M., & Hellhammer, D. H. (1993). The 'Trier Social Stress Test'—A tool for  
686 investigating psychobiological stress responses in a laboratory setting. *Neuropsychobiology*,  
687 28(1–2), 76–81. <https://doi.org/10.1159/000119004>
- 688 Kirschbaum, C., Wüst, S., & Hellhammer, D. (1992). Consistent sex differences in cortisol responses  
689 to psychological stress. *Psychosomatic Medicine*, 54(6), 648–657.
- 690 Koran, M. E. I., Wagener, M., Hohman, T. J., & Alzheimer's Neuroimaging Initiative. (2017). Sex  
691 differences in the association between AD biomarkers and cognitive decline. *Brain Imaging*  
692 *and Behavior*, 11(1), 205–213. <https://doi.org/10.1007/s11682-016-9523-8>

- 693 Kudielka, B. M., & Kirschbaum, C. (2005). Sex differences in HPA axis responses to stress: A review.  
694 *Biological Psychology*, 69(1), 113–132. <https://doi.org/10.1016/j.biopsycho.2004.11.009>
- 695 Laughlin, G. A., & Barrett-Connor, E. (2000). Sexual dimorphism in the influence of advanced aging  
696 on adrenal hormone levels: The Rancho Bernardo Study. *The Journal of Clinical*  
697 *Endocrinology and Metabolism*, 85(10), 3561–3568. <https://doi.org/10.1210/jcem.85.10.6861>
- 698 Letenneur, L., Gilleron, V., Commenges, D., Helmer, C., Orgogozo, J. M., & Dartigues, J. F. (1999).  
699 Are sex and educational level independent predictors of dementia and Alzheimer’s disease?  
700 Incidence data from the PAQUID project. *Journal of Neurology, Neurosurgery, and Psychiatry*,  
701 66(2), 177–183.
- 702 Lin, K. A., Choudhury, K. R., Rathakrishnan, B. G., Marks, D. M., Petrella, J. R., Doraiswamy, P. M.,  
703 & Alzheimer’s Disease Neuroimaging Initiative. (2015). Marked gender differences in  
704 progression of mild cognitive impairment over 8 years. *Alzheimer’s & Dementia (New York, N.*  
705 *Y.)*, 1(2), 103–110. <https://doi.org/10.1016/j.trci.2015.07.001>
- 706 Lin, P.-J., & Neumann, P. J. (2013). The economics of mild cognitive impairment. *Alzheimer’s &*  
707 *Dementia: The Journal of the Alzheimer’s Association*, 9(1), 58–62.  
708 <https://doi.org/10.1016/j.jalz.2012.05.2117>
- 709 Liu, C. K., Lai, C. L., Tai, C. T., Lin, R. T., Yen, Y. Y., & Howng, S. L. (1998). Incidence and  
710 subtypes of dementia in southern Taiwan: Impact of socio-demographic factors. *Neurology*,  
711 50(6), 1572–1579.
- 712 Liu-Ambrose, T., Barha, C. K., & Best, J. R. (2018). Physical activity for brain health in older adults.  
713 *Applied Physiology, Nutrition, and Metabolism = Physiologie Appliquee, Nutrition Et*  
714 *Metabolisme*, 43(11), 1105–1112. <https://doi.org/10.1139/apnm-2018-0260>
- 715 Lupien, S. J., de Leon, M., de Santi, S., Convit, A., Tarshish, C., Nair, N. P., ... Meaney, M. J. (1998).  
716 Cortisol levels during human aging predict hippocampal atrophy and memory deficits. *Nature*  
717 *Neuroscience*, 1(1), 69–73. <https://doi.org/10.1038/271>

- 718 Lupien, S. J., Maheu, F., Tu, M., Fiocco, A., & Schramek, T. E. (2007). The effects of stress and stress  
719 hormones on human cognition: Implications for the field of brain and cognition. *Brain and*  
720 *Cognition*, *65*(3), 209–237. <https://doi.org/10.1016/j.bandc.2007.02.007>
- 721 Lupien, Sonia J., McEwen, B. S., Gunnar, M. R., & Heim, C. (2009). Effects of stress throughout the  
722 lifespan on the brain, behaviour and cognition. *Nature Reviews. Neuroscience*, *10*(6), 434–445.  
723 <https://doi.org/10.1038/nrn2639>
- 724 Mayes, A. R., Holdstock, J. S., Isaac, C. L., Montaldi, D., Grigor, J., Gummer, A., ... Norman, K. A.  
725 (2004). Associative recognition in a patient with selective hippocampal lesions and relatively  
726 normal item recognition. *Hippocampus*, *14*(6), 763–784. <https://doi.org/10.1002/hipo.10211>
- 727 Mielke, M. M., Vemuri, P., & Rocca, W. A. (2014). Clinical epidemiology of Alzheimer’s disease:  
728 Assessing sex and gender differences. *Clinical Epidemiology*, *6*, 37–48.  
729 <https://doi.org/10.2147/CLEP.S37929>
- 730 Mungas, D., Reed, B. R., Jagust, W. J., DeCarli, C., Mack, W. J., Kramer, J. H., ... Chui, H. C. (2002).  
731 Volumetric MRI predicts rate of cognitive decline related to AD and cerebrovascular disease.  
732 *Neurology*, *59*(6), 867–873.
- 733 Newcomer, J. W., Selke, G., Melson, A. K., Hershey, T., Craft, S., Richards, K., & Alderson, A. L.  
734 (1999). Decreased memory performance in healthy humans induced by stress-level cortisol  
735 treatment. *Archives of General Psychiatry*, *56*(6), 527–533.
- 736 Norman, R. M. G., Gawronski, B., Hampson, E., Sorrentino, R. M., Szeto, A., & Ye, Y. (2010).  
737 Physical proximity in anticipation of meeting someone with schizophrenia: The role of explicit  
738 evaluations, implicit evaluations and cortisol levels. *Schizophrenia Research*, *124*(1–3), 74–80.  
739 <https://doi.org/10.1016/j.schres.2010.07.021>
- 740 Ott, A., Stolk, R. P., van Harskamp, F., Pols, H. A., Hofman, A., & Breteler, M. M. (1999). Diabetes  
741 mellitus and the risk of dementia: The Rotterdam Study. *Neurology*, *53*(9), 1937–1942.



- 742 Otte, C., Hart, S., Neylan, T. C., Marmar, C. R., Yaffe, K., & Mohr, D. C. (2005). A meta-analysis of  
743 cortisol response to challenge in human aging: Importance of gender.  
744 *Psychoneuroendocrinology*, *30*(1), 80–91. <https://doi.org/10.1016/j.psyneuen.2004.06.002>
- 745 Petersen, R. C., Roberts, R. O., Knopman, D. S., Geda, Y. E., Cha, R. H., Pankratz, V. S., ... Rocca,  
746 W. A. (2010). Prevalence of mild cognitive impairment is higher in men. The Mayo Clinic  
747 Study of Aging. *Neurology*, *75*(10), 889–897. <https://doi.org/10.1212/WNL.0b013e3181f11d85>
- 748 Petersen, R. C., Smith, G. E., Waring, S. C., Ivnik, R. J., Tangalos, E. G., & Kokmen, E. (1999). Mild  
749 cognitive impairment: Clinical characterization and outcome. *Archives of Neurology*, *56*(3),  
750 303–308.
- 751 Popp, J., Wolfsgruber, S., Heuser, I., Peters, O., Hüll, M., Schröder, J., ... Jessen, F. (2015).  
752 Cerebrospinal fluid cortisol and clinical disease progression in MCI and dementia of  
753 Alzheimer's type. *Neurobiology of Aging*, *36*(2), 601–607.  
754 <https://doi.org/10.1016/j.neurobiolaging.2014.10.031>
- 755 Pruessner, J. C., Kirschbaum, C., Meinlschmid, G., & Hellhammer, D. H. (2003). Two formulas for  
756 computation of the area under the curve represent measures of total hormone concentration  
757 versus time-dependent change. *Psychoneuroendocrinology*, *28*(7), 916–931.
- 758 Pruessner, M., Pruessner, J. C., Hellhammer, D. H., Bruce Pike, G., & Lupien, S. J. (2007). The  
759 associations among hippocampal volume, cortisol reactivity, and memory performance in  
760 healthy young men. *Psychiatry Research*, *155*(1), 1–10.  
761 <https://doi.org/10.1016/j.psychresns.2006.12.007>
- 762 Rahe, J., Becker, J., Fink, G. R., Kessler, J., Kukolja, J., Rahn, A., ... Kalbe, E. (2015). Cognitive  
763 training with and without additional physical activity in healthy older adults: Cognitive effects,  
764 neurobiological mechanisms, and prediction of training success. *Frontiers in Aging  
765 Neuroscience*, *7*, 187. <https://doi.org/10.3389/fnagi.2015.00187>



- 766 Rahe, J., Liesk, J., Rosen, J. B., Petrelli, A., Kaesberg, S., Onur, O. A., ... Kalbe, E. (2015). Sex  
767 differences in cognitive training effects of patients with amnesic mild cognitive impairment.  
768 *Neuropsychology, Development, and Cognition. Section B, Aging, Neuropsychology and*  
769 *Cognition*, 22(5), 620–638. <https://doi.org/10.1080/13825585.2015.1028883>
- 770 Rahe, J., Petrelli, A., Kaesberg, S., Fink, G. R., Kessler, J., & Kalbe, E. (2015). Effects of cognitive  
771 training with additional physical activity compared to pure cognitive training in healthy older  
772 adults. *Clinical Interventions in Aging*, 10, 297–310. <https://doi.org/10.2147/CIA.S74071>
- 773 Raz, N. (2000). Aging of the brain and its impact on cognitive performance: Integration of structural  
774 and functional findings. In *The handbook of aging and cognition, 2nd ed* (pp. 1–90). Mahwah,  
775 NJ, US: Lawrence Erlbaum Associates Publishers.
- 776 Raz, N., & Rodrigue, K. M. (2006). Differential aging of the brain: Patterns, cognitive correlates and  
777 modifiers. *Neuroscience and Biobehavioral Reviews*, 30(6), 730–748.  
778 <https://doi.org/10.1016/j.neubiorev.2006.07.001>
- 779 Roberts, R. O., Geda, Y. E., Knopman, D. S., Cha, R. H., Pankratz, V. S., Boeve, B. F., ... Petersen, R.  
780 C. (2012). The incidence of MCI differs by subtype and is higher in men: The Mayo Clinic  
781 Study of Aging. *Neurology*, 78(5), 342–351. <https://doi.org/10.1212/WNL.0b013e3182452862>
- 782 Roberts, Rosebud O., Knopman, D. S., Mielke, M. M., Cha, R. H., Pankratz, V. S., Christianson, T. J.  
783 H., ... Petersen, R. C. (2014). Higher risk of progression to dementia in mild cognitive  
784 impairment cases who revert to normal. *Neurology*, 82(4), 317–325.  
785 <https://doi.org/10.1212/WNL.0000000000000055>
- 786 Robinson, M. E., Riley, J. L., Myers, C. D., Sadler, I. J., Kvaal, S. A., Geisser, M. E., & Keefe, F. J.  
787 (1997). The Coping Strategies Questionnaire: A large sample, item level factor analysis. *The*  
788 *Clinical Journal of Pain*, 13(1), 43–49.
- 789 Ruitenber, A., Ott, A., van Swieten, J. C., Hofman, A., & Breteler, M. M. (2001). Incidence of  
790 dementia: Does gender make a difference? *Neurobiology of Aging*, 22(4), 575–580.

- 791 Sachdev, P. S., Lipnicki, D. M., Kochan, N. A., Crawford, J. D., Thalamuthu, A., Andrews, G., ...  
792 Cohort Studies of Memory in an International Consortium (COSMIC). (2015). The Prevalence  
793 of Mild Cognitive Impairment in Diverse Geographical and Ethnocultural Regions: The  
794 COSMIC Collaboration. *PloS One*, *10*(11), e0142388.  
795 <https://doi.org/10.1371/journal.pone.0142388>
- 796 Shi, F., Liu, B., Zhou, Y., Yu, C., & Jiang, T. (2009). Hippocampal volume and asymmetry in mild  
797 cognitive impairment and Alzheimer's disease: Meta-analyses of MRI studies. *Hippocampus*,  
798 *19*(11), 1055–1064. <https://doi.org/10.1002/hipo.20573>
- 799 Sinforiani, E., Citterio, A., Zucchella, C., Bono, G., Corbetta, S., Merlo, P., & Mauri, M. (2010).  
800 Impact of gender differences on the outcome of Alzheimer's disease. *Dementia and Geriatric*  
801 *Cognitive Disorders*, *30*(2), 147–154. <https://doi.org/10.1159/000318842>
- 802 Sohn, D., Shpanskaya, K., Lucas, J. E., Petrella, J. R., Saykin, A. J., Tanzi, R. E., ... Doraiswamy, P.  
803 M. (2018). Sex Differences in Cognitive Decline in Subjects with High Likelihood of Mild  
804 Cognitive Impairment due to Alzheimer's disease. *Scientific Reports*, *8*(1), 7490.  
805 <https://doi.org/10.1038/s41598-018-25377-w>
- 806 Souza-Talarico, J. N., Chaves, E. C., Lupien, S. J., Nitrini, R., & Caramelli, P. (2010). Relationship  
807 between cortisol levels and memory performance may be modulated by the presence or absence  
808 of cognitive impairment: Evidence from healthy elderly, mild cognitive impairment and  
809 Alzheimer's disease subjects. *Journal of Alzheimer's Disease: JAD*, *19*(3), 839–848.  
810 <https://doi.org/10.3233/JAD-2010-1282>
- 811 Spreen, O., & Strauss, E. (1998). *A compendium of neuropsychological tests: Administration, norms,*  
812 *and commentary, 2nd ed.* New York, NY, US: Oxford University Press.
- 813 Sundermann, E. E., Biegon, A., Rubin, L. H., Lipton, R. B., Landau, S., Maki, P. M., & Alzheimer's  
814 Disease Neuroimaging Initiative. (2017). Does the Female Advantage in Verbal Memory

- 815           Contribute to Underestimating Alzheimer's Disease Pathology in Women versus Men? *Journal*  
816           *of Alzheimer's Disease: JAD*, 56(3), 947–957. <https://doi.org/10.3233/JAD-160716>
- 817   Ton, T. G. N., DeLeire, T., May, S. G., Hou, N., Tebeka, M. G., Chen, E., & Chodosh, J. (2017). The  
818           financial burden and health care utilization patterns associated with amnesic mild cognitive  
819           impairment. *Alzheimer's & Dementia: The Journal of the Alzheimer's Association*, 13(3), 217–  
820           224. <https://doi.org/10.1016/j.jalz.2016.08.009>
- 821   Tortosa-Martínez, J., Manchado, C., Cortell-Tormo, J. M., & Chulvi-Medrano, I. (2018). Exercise, the  
822           diurnal cycle of cortisol and cognitive impairment in older adults. *Neurobiology of Stress*, 9,  
823           40–47. <https://doi.org/10.1016/j.ynstr.2018.08.004>
- 824   Troyer, A. K., D'Souza, N. A., Vandermorris, S., & Murphy, K. J. (2011). Age-related differences in  
825           associative memory depend on the types of associations that are formed. *Neuropsychology,*  
826           *Development, and Cognition. Section B, Aging, Neuropsychology and Cognition*, 18(3), 340–  
827           352. <https://doi.org/10.1080/13825585.2011.553273>
- 828   Troyer, A. K., Murphy, K. J., Anderson, N. D., Craik, F. I. M., Moscovitch, M., Maione, A., & Gao, F.  
829           (2012). Associative recognition in mild cognitive impairment: Relationship to hippocampal  
830           volume and apolipoprotein E. *Neuropsychologia*, 50(14), 3721–3728.  
831           <https://doi.org/10.1016/j.neuropsychologia.2012.10.018>
- 832   Troyer, A. K., Murphy, K. J., Anderson, N. D., Hayman-Abello, B. A., Craik, F. I. M., & Moscovitch,  
833           M. (2008). Item and associative memory in amnesic mild cognitive impairment: Performance  
834           on standardized memory tests. *Neuropsychology*, 22(1), 10–16. [https://doi.org/10.1037/0894-](https://doi.org/10.1037/0894-4105.22.1.10)  
835           4105.22.1.10
- 836   Venero, C., Díaz-Mardomingo, C., Pereda-Pérez, I., García-Herranz, S., Utrera, L., Valencia, A., &  
837           Peraita, H. (2013). Increased morning salivary cortisol levels in older adults with nonamnesic  
838           and multidomain mild cognitive impairment. *Psychoneuroendocrinology*, 38(4), 488–498.  
839           <https://doi.org/10.1016/j.psyneuen.2012.07.007>

- 840 Vogel, S., & Schwabe, L. (2016). Learning and memory under stress: Implications for the classroom.  
841 *NPJ Science of Learning, 1*, 16011. <https://doi.org/10.1038/npjscilearn.2016.11>
- 842 Wang, L. Y., Raskind, M. A., Wilkinson, C. W., Shofer, J. B., Sikkema, C., Szot, P., ... Peskind, E. R.  
843 (2018). Associations between CSF cortisol and CSF norepinephrine in cognitively normal  
844 controls and patients with amnesic MCI and AD dementia. *International Journal of Geriatric*  
845 *Psychiatry, 33*(5), 763–768. <https://doi.org/10.1002/gps.4856>
- 846 Ward, A., Arrighi, H. M., Michels, S., & Cedarbaum, J. M. (2012). Mild cognitive impairment:  
847 Disparity of incidence and prevalence estimates. *Alzheimer's & Dementia: The Journal of the*  
848 *Alzheimer's Association, 8*(1), 14–21. <https://doi.org/10.1016/j.jalz.2011.01.002>
- 849 Wechsler, D. (1997). *Wechsler Adult Intelligence Scale®—Third Edition* (3rd ed.). Retrieved from  
850 [https://www.pearsonclinical.com/psychology/products/100000243/wechsler-adult-intelligence-](https://www.pearsonclinical.com/psychology/products/100000243/wechsler-adult-intelligence-scale--third-edition-wais-iii.html)  
851 [scale--third-edition-wais-iii.html](https://www.pearsonclinical.com/psychology/products/100000243/wechsler-adult-intelligence-scale--third-edition-wais-iii.html)
- 852 Wolf, O. T., Convit, A., Thorn, E., & de Leon, M. J. (2002). Salivary cortisol day profiles in elderly  
853 with mild cognitive impairment. *Psychoneuroendocrinology, 27*(7), 777–789.
- 854 Wood, G. E., & Shors, T. J. (1998). Stress facilitates classical conditioning in males, but impairs  
855 classical conditioning in females through activational effects of ovarian hormones. *Proceedings*  
856 *of the National Academy of Sciences of the United States of America, 95*(7), 4066–4071.
- 857 Yen, S. S., & Laughlin, G. A. (1998). Aging and the adrenal cortex. *Experimental Gerontology, 33*(7–  
858 8), 897–910.
- 859 Yoshitake, T., Kiyohara, Y., Kato, I., Ohmura, T., Iwamoto, H., Nakayama, K., ... Ueda, K. (1995).  
860 Incidence and risk factors of vascular dementia and Alzheimer's disease in a defined elderly  
861 Japanese population: The Hisayama Study. *Neurology, 45*(6), 1161–1168.
- 862 Zigmond, A. S., & Snaith, R. P. (1983). The hospital anxiety and depression scale. *Acta Psychiatrica*  
863 *Scandinavica, 67*(6), 361–370.
- 864
